# Supplementary material for: Untargeted urinary metabolomics by CREBRF rs373863828 (p.Arg457Gln) variant among individuals without type 2 diabetes
Source: Research Square preprint supplement (doi:10.21203/rs.3.rs-6372155/v1), 2025-05-13
Supplement: Supplementary file 1 [file f93be0ef7743aa08215eeaff.docx]

**Supplementary materials**

**Supplementary Figures**

Supplementary Figure 1: Boxplot distribution comparing unnormalised and normalised metabolite data

**
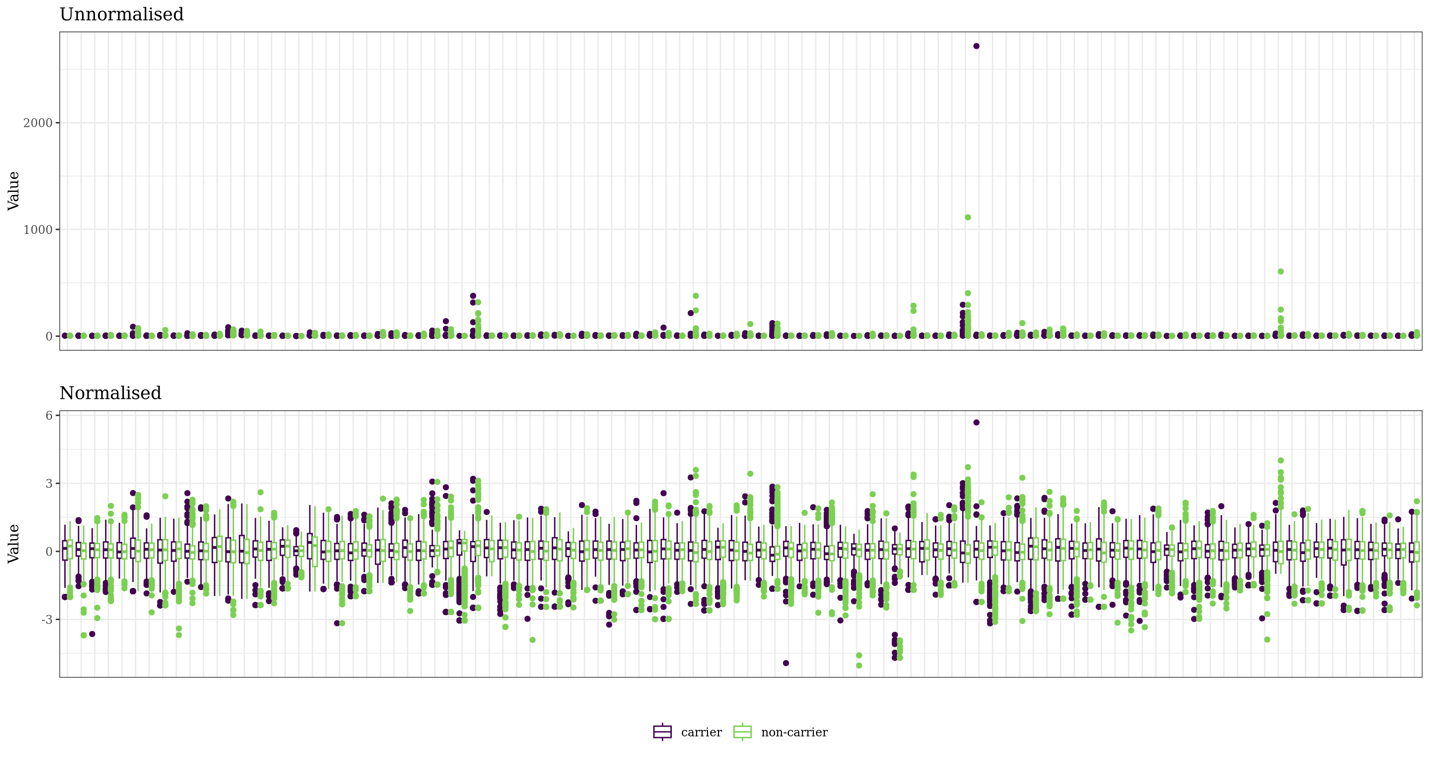
**

*Note that this figure only displays a random subset of 100 metabolites from the full dataset for visualisation purposes.

Supplementary Figure 2: Density distribution comparing unnormalised and normalised metabolite data

**
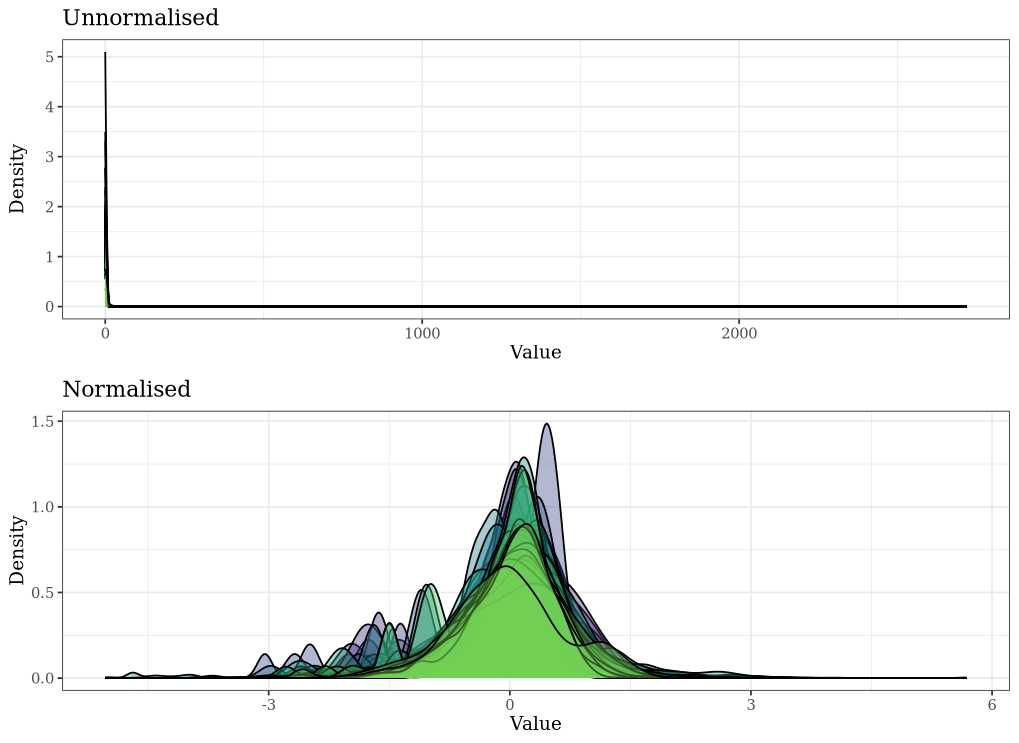
**

*Note that this figure only displays a random subset of 100 metabolites from the full dataset for visualisation purposes.

Supplementary Figure 3: Flow diagram of participants in the metabolomics analysis


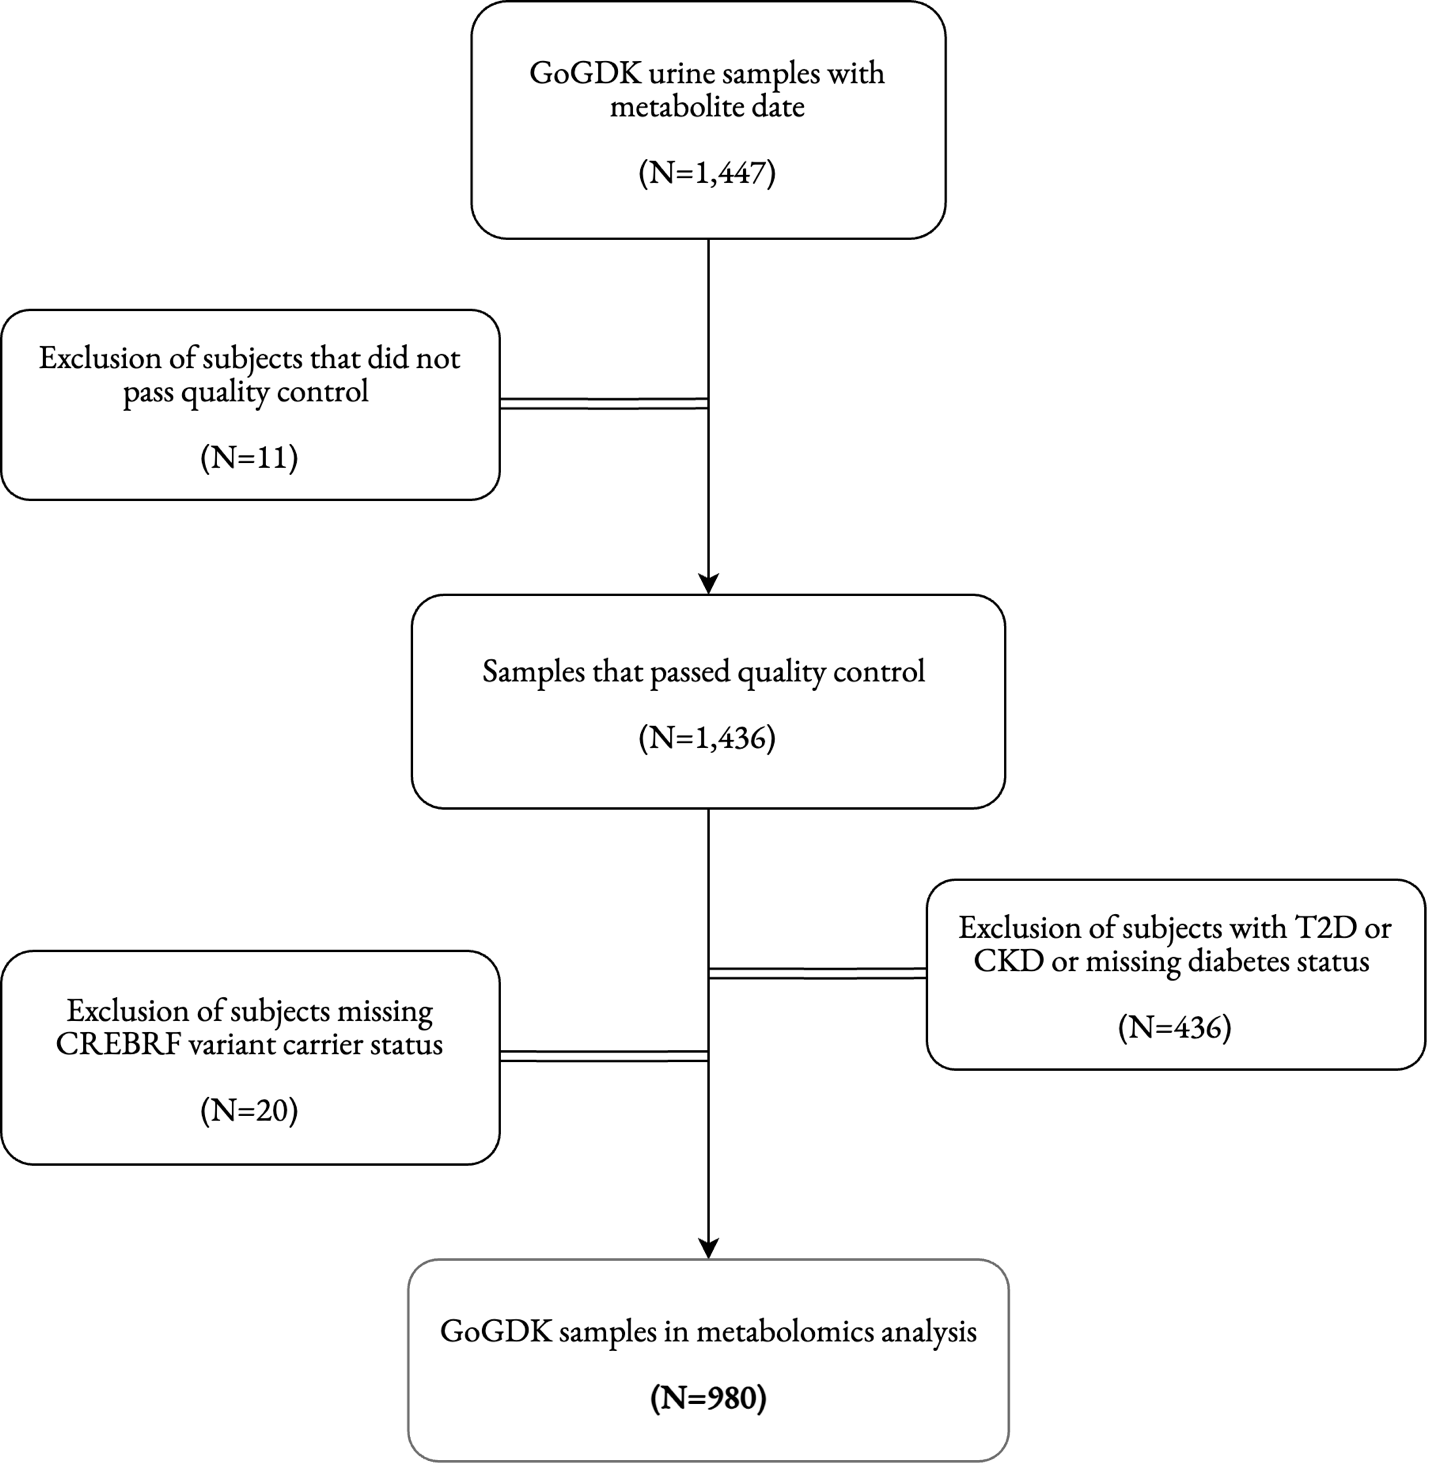


Abbreviations: GoGDK, Genetics of Gout, Diabetes, and Kidney disease; T2D, type 2 diabetes; CKD, chronic kidney disease; CREBRF, CREB3 regulatory factor.

**Supplementary Tables**

Supplementary Table 1: Full results from pathway analysis in the male group

| Pathway | Total | Expected | Hits | Raw p | -log10(p) | FDR | Impact |
| --- | --- | --- | --- | --- | --- | --- | --- |
| Ascorbate and aldarate metabolism | 9 | 0.12 | 2 | 5.76e-03 | 2.24 | 2.86e-01 | 0.00 |
| Caffeine metabolism | 10 | 0.13 | 2 | 7.15e-03 | 2.15 | 2.86e-01 | 0.31 |
| Butanoate metabolism | 15 | 0.20 | 2 | 1.60e-02 | 1.80 | 3.63e-01 | 0.03 |
| Histidine metabolism | 16 | 0.21 | 2 | 1.82e-02 | 1.74 | 3.63e-01 | 0.17 |
| Neomycin, kanamycin and gentamicin biosynthesis | 2 | 0.03 | 1 | 2.65e-02 | 1.58 | 4.07e-01 | 0.00 |
| beta-Alanine metabolism | 21 | 0.28 | 2 | 3.05e-02 | 1.52 | 4.07e-01 | 0.00 |
| Alanine, aspartate and glutamate metabolism | 28 | 0.37 | 2 | 5.20e-02 | 1.28 | 5.94e-01 | 0.09 |
| Glycine, serine and threonine metabolism | 33 | 0.44 | 2 | 6.98e-02 | 1.16 | 6.98e-01 | 0.10 |
| Arginine and proline metabolism | 36 | 0.48 | 2 | 8.13e-02 | 1.09 | 7.23e-01 | 0.07 |
| Pyrimidine metabolism | 39 | 0.52 | 2 | 9.34e-02 | 1.03 | 7.42e-01 | 0.09 |
| Taurine and hypotaurine metabolism | 8 | 0.11 | 1 | 1.02e-01 | 9.91e-01 | 7.42e-01 | 0.17 |
| Nicotinate and nicotinamide metabolism | 15 | 0.20 | 1 | 1.83e-01 | 7.37e-01 | 1.00 | 0.00 |
| Glycerolipid metabolism | 16 | 0.21 | 1 | 1.94e-01 | 7.12e-01 | 1.00 | 0.09 |
| Starch and sucrose metabolism | 18 | 0.24 | 1 | 2.16e-01 | 6.66e-01 | 1.00 | 0.14 |
| Pentose and glucuronate interconversions | 19 | 0.25 | 1 | 2.26e-01 | 6.45e-01 | 1.00 | 0.11 |
| Pantothenate and CoA biosynthesis | 20 | 0.27 | 1 | 2.37e-01 | 6.26e-01 | 1.00 | 0.00 |
| Citrate cycle (TCA cycle) | 20 | 0.27 | 1 | 2.37e-01 | 6.26e-01 | 1.00 | 0.03 |
| Purine metabolism | 70 | 0.93 | 2 | 2.39e-01 | 6.22e-01 | 1.00 | 0.01 |
| Propanoate metabolism | 22 | 0.29 | 1 | 2.57e-01 | 5.90e-01 | 1.00 | 0.00 |
| Pentose phosphate pathway | 23 | 0.31 | 1 | 2.67e-01 | 5.73e-01 | 1.00 | 0.00 |
| Glutathione metabolism | 28 | 0.37 | 1 | 3.16e-01 | 5.01e-01 | 1.00 | 0.01 |
| Inositol phosphate metabolism | 30 | 0.40 | 1 | 3.34e-01 | 4.76e-01 | 1.00 | 0.00 |
| Sphingolipid metabolism | 32 | 0.43 | 1 | 3.52e-01 | 4.53e-01 | 1.00 | 0.01 |
| Glyoxylate and dicarboxylate metabolism | 32 | 0.43 | 1 | 3.52e-01 | 4.53e-01 | 1.00 | 0.08 |
| Cysteine and methionine metabolism | 33 | 0.44 | 1 | 3.61e-01 | 4.43e-01 | 1.00 | 0.02 |
| Glycerophospholipid metabolism | 36 | 0.48 | 1 | 3.87e-01 | 4.13e-01 | 1.00 | 0.02 |
| Steroid hormone biosynthesis | 87 | 1.16 | 1 | 6.99e-01 | 1.55e-01 | 1.00 | 0.00 |

P-values are derived from pathway enrichment analysis and pathway impact values are from pathway topology analysis.

P-values that are statistically significant are shown in bold (*p* < 0.05).

Abbreviation: FDR, false discovery rate.
